# Supplementary material for: 3D macroporous TiO2inverse opal binary and ternary composite materials and their photocatalytic activity
Source: Royal Society of Chemistry journal article supplement (doi:10.1039/c7ra06051c), 2017-01-01
Supplement: c7ra06051c1.pdf [file c7ra06051c1.pdf]

# **3D Macroporous TiO<sub>2</sub> Inverse Opal Binary and Ternary Composite Materials and Their Photocatalytic Activity**

**Daniel A. Corella, and Bharat Baruah\***

*Department of Chemistry and Biochemistry, Kennesaw State University, Kennesaw, GA 30144-  
5591*

Corresponding author Tel: +1 470 578 2654; fax: + 1 470 578 9137.

E-mail address: [bbaruah@kennesaw.edu](mailto:bbaruah@kennesaw.edu)

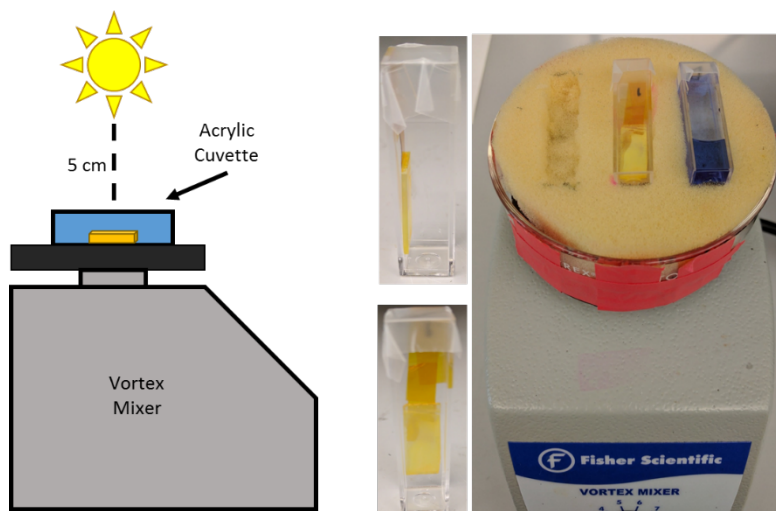

**Figure S1.** Thin film reactor setup. Cuvettes containing 1 slide and 3 mL 20  $\mu\text{M}$  TB were placed in a custom-made sample holder cushion attached to a vortex mixer for solution agitation. The edge of the cuvette was placed 5 cm from the light source.

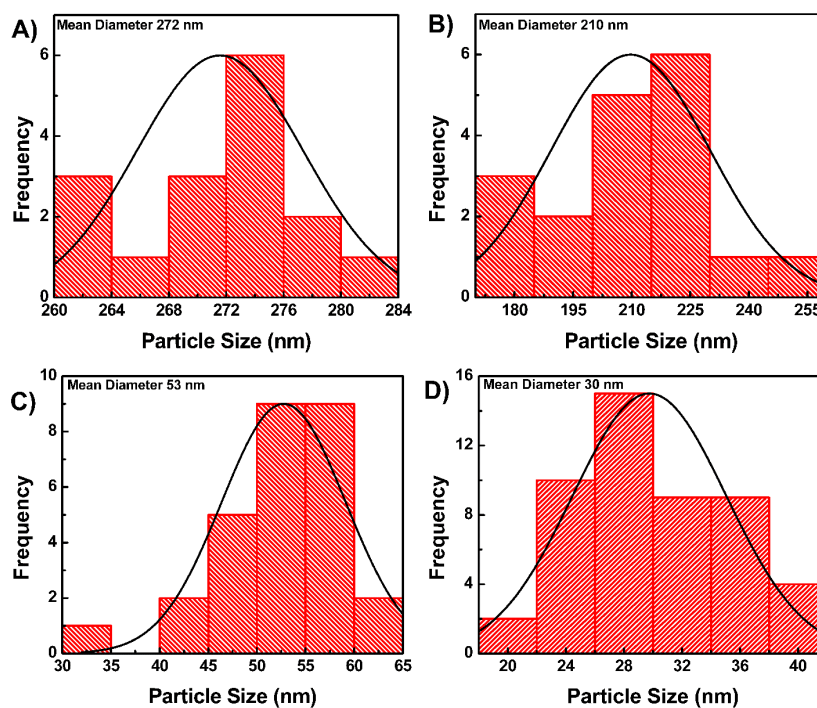

**Figure S2.** Size distribution histograms for polystyrene nanospheres (A),  $\text{TiO}_2$  inverse opals (B), gold nanoparticles (C), and CdS quantum dots (D). Mean diameters were determined to be  $272 \pm$

6 nm,  $210 \pm 20$  nm,  $53 \pm 6$  nm, and  $30 \pm 5$  nm respectively. Measurements taken on SEM images using imageJ software.

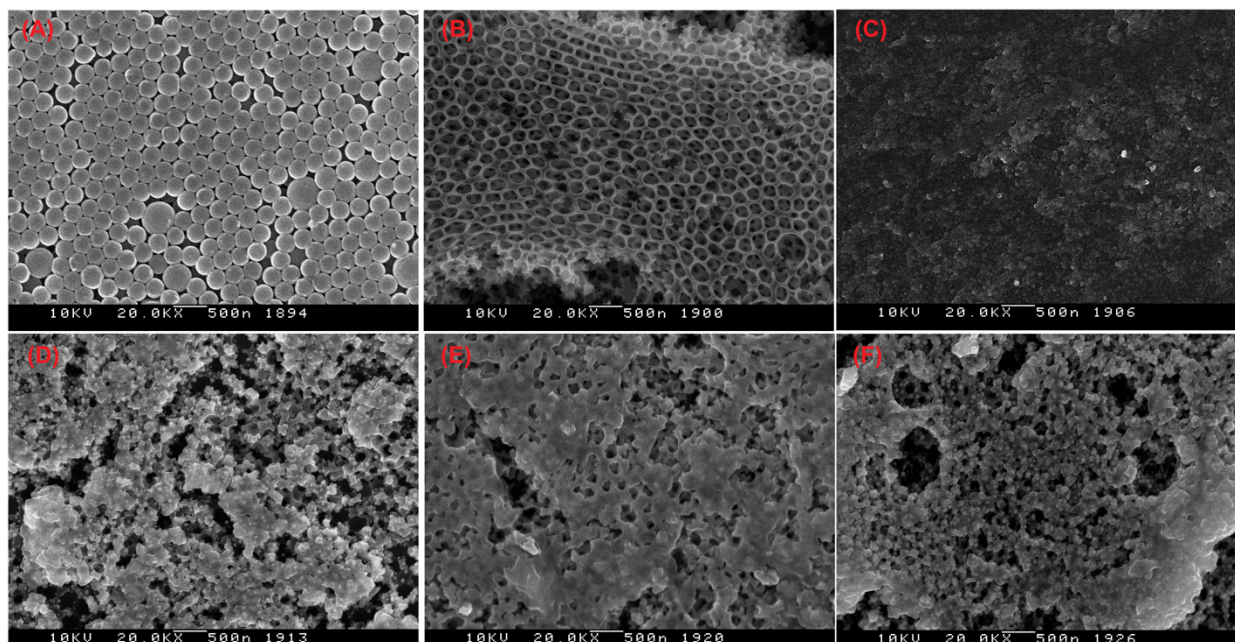

**Figure S3.** SEM images of PS film (a), IO-TiO<sub>2</sub> (b), CdS (c), IO-TiO<sub>2</sub>-AuNPs (d), IO-TiO<sub>2</sub>-CdS (e), and IO-TiO<sub>2</sub>-AuNPs-CdS (f) are shown (scale bar is 500 nm). Images were taken with Topcon DS150 Field Emission Scanning Electron Microscope.

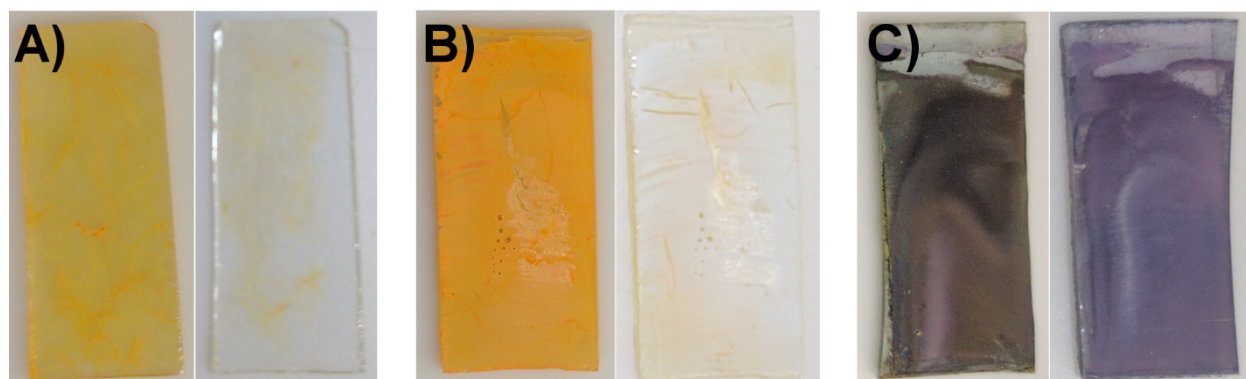

**Figure S4.** Observed loss of CdS due to photocorrosion for (A) CdS thin film, (B) binary IO-TiO<sub>2</sub>-CdS, and (C) ternary IO-TiO<sub>2</sub>-AuNPs-CdS systems.

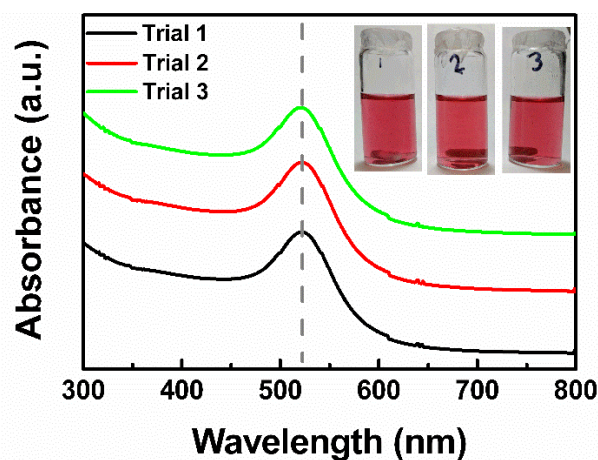

**Figure S5.** UV-visible absorption spectra for the residual gold colloid solutions after *in-situ* synthesis on the surface of the slides. The local surface plasmon resonance (LSPR) peak was centered at  $\lambda = 521 \pm 1$  nm.

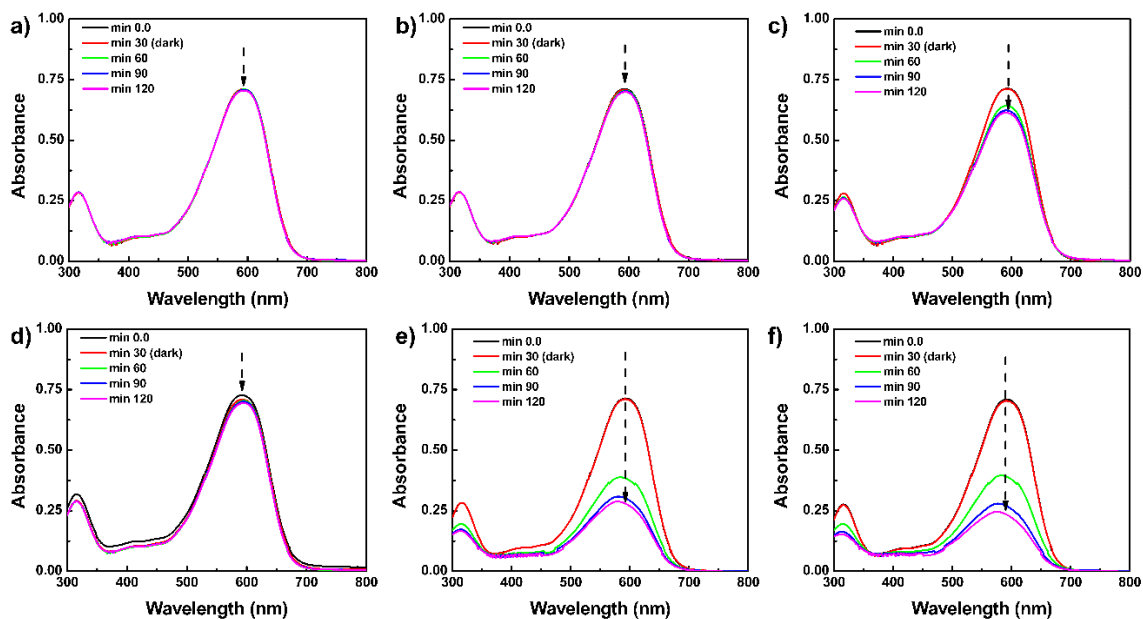

**Figure S6.** UV-visible absorption spectra for the photocatalytic degradation of 20  $\mu\text{M}$  Trypan Blue under visible LED light for a blank (a), IO-TiO<sub>2</sub> (b), CdS (c), IO-TiO<sub>2</sub>-AuNPs (d), IO-TiO<sub>2</sub>-CdS (e), and IO-TiO<sub>2</sub>-AuNPs-CdS (f).

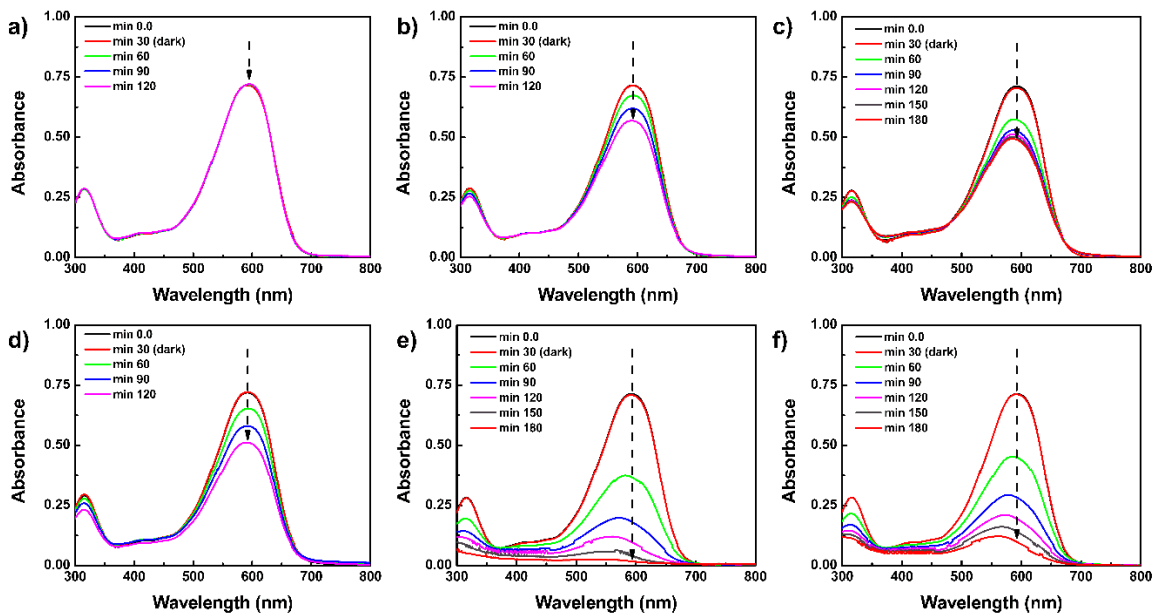

**Figure S7.** UV-visible absorption spectra for the photocatalytic degradation of 20  $\mu\text{M}$  Trypan Blue under UV light for a blank (a), IO-TiO<sub>2</sub> (b), CdS (c), IO-TiO<sub>2</sub>-AuNPs (d), IO-TiO<sub>2</sub>-CdS (e), and IO-TiO<sub>2</sub>-AuNPs-CdS (sf).

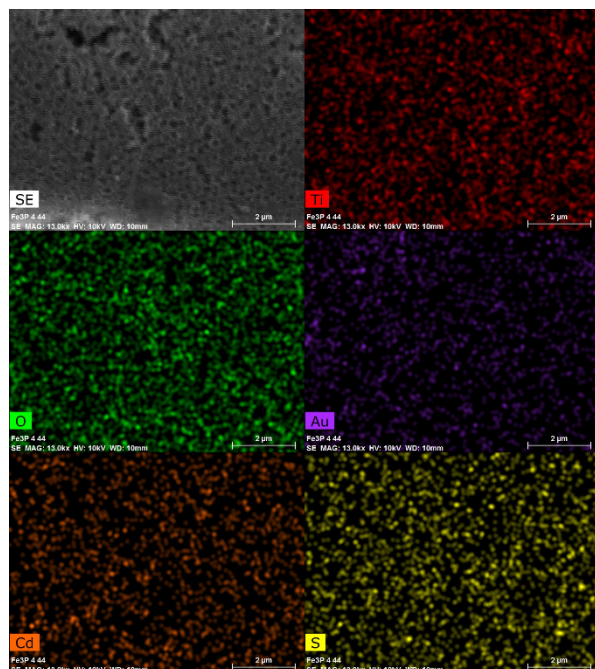

| Element  | Energy (keV) | Normalized Weight % | Normalized Atomic % |
|----------|--------------|---------------------|---------------------|
| Oxygen   | 0.53         | 30.29               | 61.12               |
| Titanium | 4.49         | 41.21               | 27.78               |
| Sulfur   | 2.30         | 5.05                | 5.09                |
| Cadmium  | 3.14         | 17.62               | 5.06                |
| Gold     | 2.13         | 5.83                | 0.96                |

**Figure S8.** EDX mapping and normalized weight and atomic percentages for the elemental components of the ternary IO-TiO<sub>2</sub>-AuNPs-CdS system.

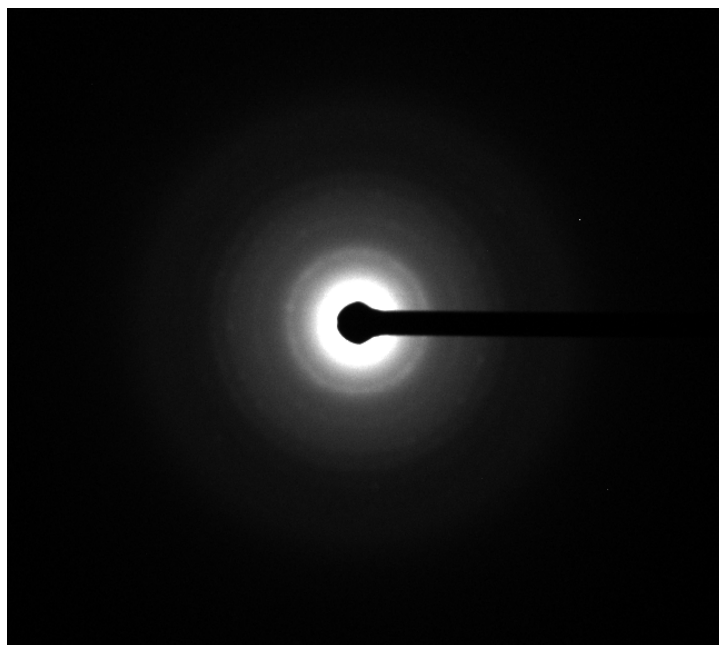

**Figure S9.** The Selected area electron diffraction (SAED) pattern of IO-TiO<sub>2</sub>-CdS indicates the nanocrystalline forms of TiO<sub>2</sub> and CdS.
